# Supplementary material
Source: PubMed Central journal article supplement (PMC7054140)
Supplement: NIHMS1062157-supplement-supplemental.pdf [file NIHMS1062157-supplement-supplemental.pdf]

**Figure S1**

|        | 10 | 14 | 17 | 18 | 19 | 20 | 21 | 22 | 23 | 24 | 25 | 34 | 35 | 36 | 38 | 41 | 46 | 47 | 49 | 51 | 147 |   |
|--------|----|----|----|----|----|----|----|----|----|----|----|----|----|----|----|----|----|----|----|----|-----|---|
| Ube2D1 | L  | Q  | P  | P  | A  | H  | C  | S  | A  | G  | P  | Q  | A  | T  | M  | P  | Q  | G  | V  | F  | M   |   |
| Ube2D2 | L  | A  | P  | P  | A  | Q  | C  | S  | A  | G  | P  | Q  | A  | T  | M  | N  | Q  | G  | V  | F  | M   |   |
| Ube2D3 | L  | A  | P  | P  | A  | Q  | C  | S  | A  | G  | P  | Q  | A  | T  | M  | N  | Q  | G  | V  | F  | M   |   |
| Ube2D4 | L  | Q  | P  | P  | A  | Q  | C  | S  | A  | G  | P  | Q  | A  | T  | M  | N  | Q  | G  | V  | F  | M   |   |
| Ube2V1 | L  | Q  | G  | D  | G  | T  | V  | S  | W  | G  | G  | T  | G  | M  | I  | P  | E  | N  | I  | S  | -   |   |
| Ube2V2 | L  | Q  | G  | D  | G  | T  | V  | S  | W  | G  | L  | T  | G  | M  | I  | P  | E  | N  | I  | S  | -   |   |
| Ube2G1 | L  | N  | P  | V  | E  | G  | F  | S  | A  | G  | L  | E  | V  | L  | I  | P  | E  | G  | V  | K  | K   |   |
| Ube2G2 | Y  | T  | P  | P  | E  | G  | I  | V  | A  | G  | P  | E  | A  | L  | M  | E  | E  | F  | V  | P  | K   |   |
| Ube2A  | F  | Q  | P  | P  | A  | G  | V  | S  | G  | A  | P  | N  | A  | V  | F  | E  | E  | D  | T  | K  | A   |   |
| Ube2B  | F  | Q  | P  | P  | V  | G  | V  | S  | G  | A  | P  | N  | A  | V  | F  | E  | E  | D  | T  | K  | A   |   |
| Ube2E1 | L  | T  | P  | P  | P  | N  | C  | S  | A  | G  | P  | R  | S  | T  | L  | P  | E  | G  | V  | F  | T   |   |
| Ube2E2 | L  | T  | P  | P  | P  | N  | C  | S  | A  | G  | P  | R  | S  | T  | L  | P  | E  | G  | V  | F  | T   |   |
| Ube2E3 | L  | T  | P  | P  | P  | N  | C  | S  | A  | G  | P  | R  | S  | T  | L  | P  | E  | G  | V  | F  | T   |   |
| Ube2C  | L  | M  | G  | D  | K  | G  | I  | S  | A  | F  | P  | V  | G  | T  | H  | A  | E  | D  | R  | K  | S   |   |
| Ube2F  | V  | E  | L  | P  | C  | T  | C  | K  | V  | F  | P  | Q  | L  | T  | -  | D  | Q  | G  | K  | Q  | -   |   |
| Ube2H  | V  | I  | S  | K  | H  | E  | V  | T  | I  | L  | G  | V  | V  | K  | Y  | Q  | E  | G  | V  | K  | T   |   |
| Ube2I  | R  | R  | H  | P  | F  | G  | F  | V  | A  | V  | P  | E  | C  | A  | P  | K  | E  | G  | L  | K  | A   |   |
| Ube2J1 | A  | K  | P  | T  | D  | H  | Y  | H  | A  | Q  | P  | H  | F  | T  | R  | P  | D  | G  | V  | H  | G   |   |
| Ube2J2 | Y  | K  | P  | V  | P  | Y  | I  | C  | A  | E  | P  | H  | Y  | V  | R  | E  | E  | G  | Y  | H  | A   |   |
| Ube2K  | F  | L  | S  | K  | N  | Q  | I  | K  | V  | D  | L  | R  | G  | E  | A  | P  | E  | G  | R  | Q  | G   |   |
| Ube2L3 | L  | R  | G  | M  | K  | N  | F  | R  | N  | Q  | V  | Q  | G  | L  | -  | D  | D  | K  | A  | R  | E   |   |
| Ube2L6 | L  | Q  | P  | P  | P  | Y  | L  | R  | N  | S  | S  | H  | A  | L  | -  | D  | H  | L  | A  | N  | V   |   |
| Ube2M  | -  | E  | L  | P  | K  | T  | C  | D  | I  | F  | S  | K  | L  | V  | -  | D  | K  | S  | K  | V  | -   |   |
| Ube2N  | T  | L  | P  | V  | P  | G  | I  | K  | A  | E  | P  | H  | V  | V  | A  | Q  | E  | G  | T  | K  | M   |   |
| Ube2Q1 | L  | Y  | K  | G  | G  | N  | Y  | V  | A  | V  | E  | L  | N  | V  | K  | L  | D  | H  | A  | F  | L   | I |
| Ube2Q2 | L  | Y  | K  | T  | G  | I  | Y  | S  | V  | E  | L  | H  | V  | K  | Q  | D  | H  | I  | Y  | L  | I   |   |
| Ube2R1 | L  | Q  | P  | V  | E  | G  | F  | R  | V  | T  | L  | E  | V  | A  | F  | P  | E  | G  | Y  | K  | K   |   |
| Ube2R2 | L  | Q  | P  | V  | E  | G  | F  | R  | I  | T  | L  | E  | V  | A  | F  | P  | E  | G  | Y  | K  | K   |   |
| Ube2S  | Y  | T  | P  | P  | D  | G  | I  | K  | V  | F  | P  | Q  | V  | T  | E  | E  | A  | G  | L  | R  | G   |   |
| Ube2T  | L  | A  | P  | P  | P  | G  | I  | T  | C  | W  | Q  | R  | A  | Q  | L  | A  | E  | K  | V  | K  | R   |   |
| Ube2U  | F  | K  | N  | Y  | K  | G  | I  | T  | A  | K  | P  | E  | V  | E  | E  | Q  | Q  | G  | V  | Q  | M   |   |
| Ube2W  | L  | Q  | P  | P  | P  | G  | M  | T  | L  | K  | S  | I  | V  | D  | E  | P  | E  | G  | K  | Q  | T   |   |
| Ube2Z  | I  | Y  | P  | P  | P  | G  | M  | F  | V  | V  | P  | H  | A  | L  | T  | F  | E  | G  | F  | L  | V   |   |

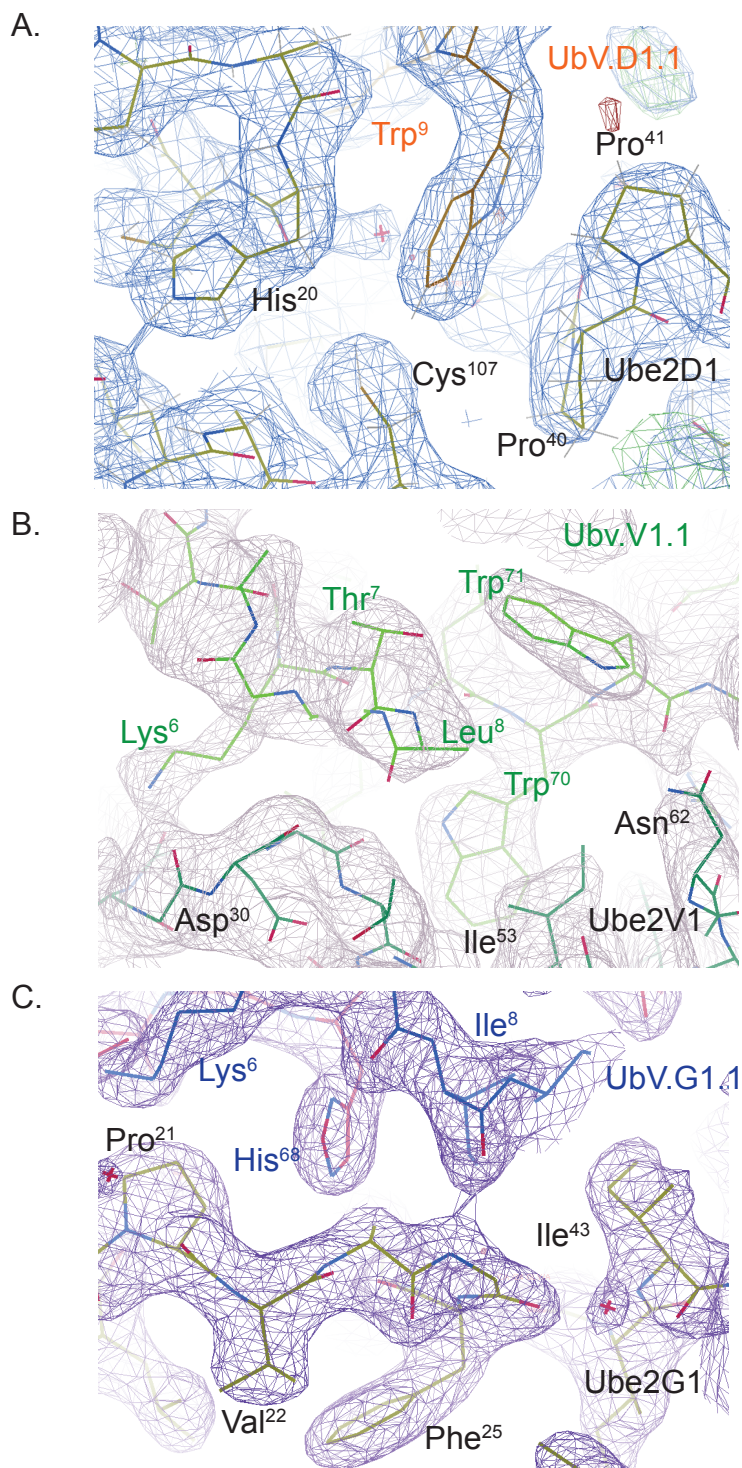

**Supplementary Figure 2.** Representative electron density of each UbV in complex with the backside of its cognate E2 protein. A) Residues of Ube2D1 and UbV.D1.1 are labelled in black or orange respectively. The electron density 2FoFc map at 2.1 Å resolution was contoured at  $1.0\sigma$  and colored blue. B) Residues of Ube2V1 and UbV.V1.1 are labelled in black or green respectively. The electron density 2FoFc map at 2.55 Å resolution was contoured at  $1.0\sigma$  and colored gray. C) Residues of Ube2G1 and UbV.G1.1 are labeled in black or blue respectively. The electron density 2FoFc map at 2.35 Å resolution was contoured at  $1.0\sigma$  and colored purple.

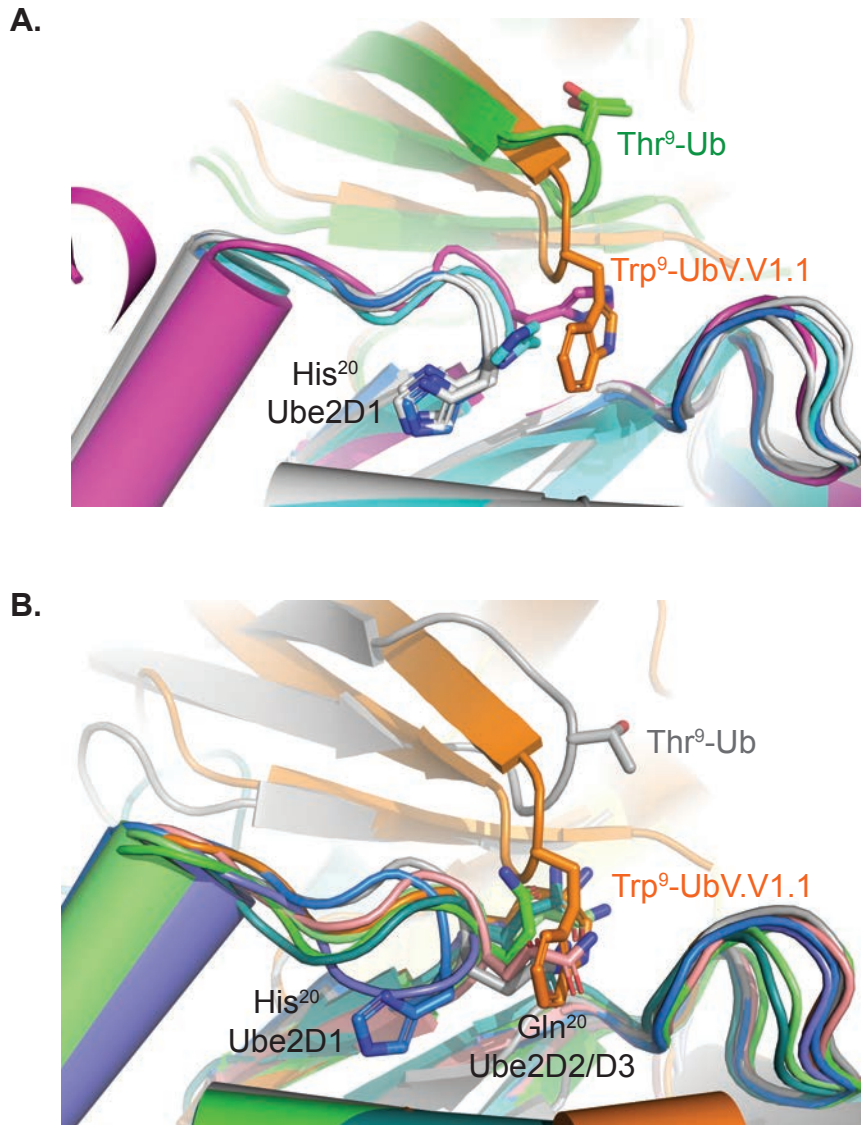

**Supplementary Figure 3. Structural basis for the specificity of UbV.D1.1 for Ube2D1 over other Ube2D family members.** (A) Trp<sup>9</sup> of UbV.D1.1 projects into a cleft on the Ube2D1 surface with His<sup>20\*</sup> in the open conformation. The same orientation of His<sup>20\*</sup> is observed in the Ube2D1~Ub donor complexes (PDB: 3OJ4, cyan; 4AP4, gray; 5TUT, gray) and Ube2D1-Ub backside complex (PDB: 3PTF, gray). An alternative closed conformation of His<sup>20\*</sup> that is observed in the Ube2D1 apo structure (PDB: 2C4P, pink) would clash with Trp<sup>9</sup> of UbV.D1.1 but not with Thr<sup>9</sup> of Ub.wt bound to the backside (PDB: 3OJ4 and 3PTF in green). (B) Trp<sup>9</sup> of UbV.D1.1 clashes with the closed conformation of Gln<sup>20\*</sup> observed in Ube2D2/3 structures (PDB: 3A33, pink; 3TDG, orange, 3UGB, light green, 3JVZ, green, 4V3L, gray and 5DIL, cyan). Thr<sup>9</sup> of Ub bound to the backside of Ube2D2 (PDB: 4V3L, gray) would not clash with the closed conformation of Gln<sup>20\*</sup>.

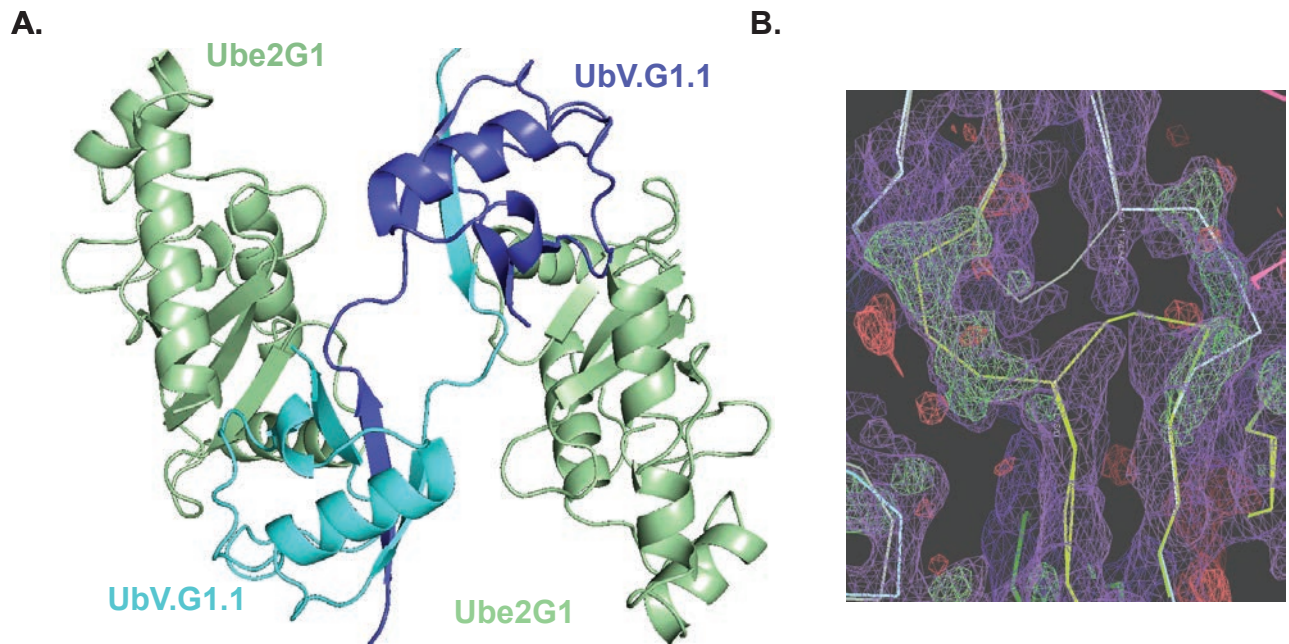

**Supplementary Figure 4.** The crystal structure of the Ube2G1-UbV.G1.1 complex. Two Ube2G1 chains (light green) bound to two UbV.G1.1 chains (cyan and blue) [RMSD of Ube2G1-UbV.G1.1 superimposed on the second complex is 0.624 Å]. The UbV.G1.1 protomers exchange  $\beta$ 1-strands, which results in a higher order complex observed in the crystal structure lattice. (B) Electron density 2fofc map (contoured at 1.0  $\sigma$ ) is shown in purple and the fofc difference density map (contoured at 2.5  $\sigma$ ) is shown in green. UbV.G1.1  $\beta$ 1- $\beta$ 2 loop regions are superimposed as separate Ub chains or as the  $\beta$ 1-strand exchanged dimer.

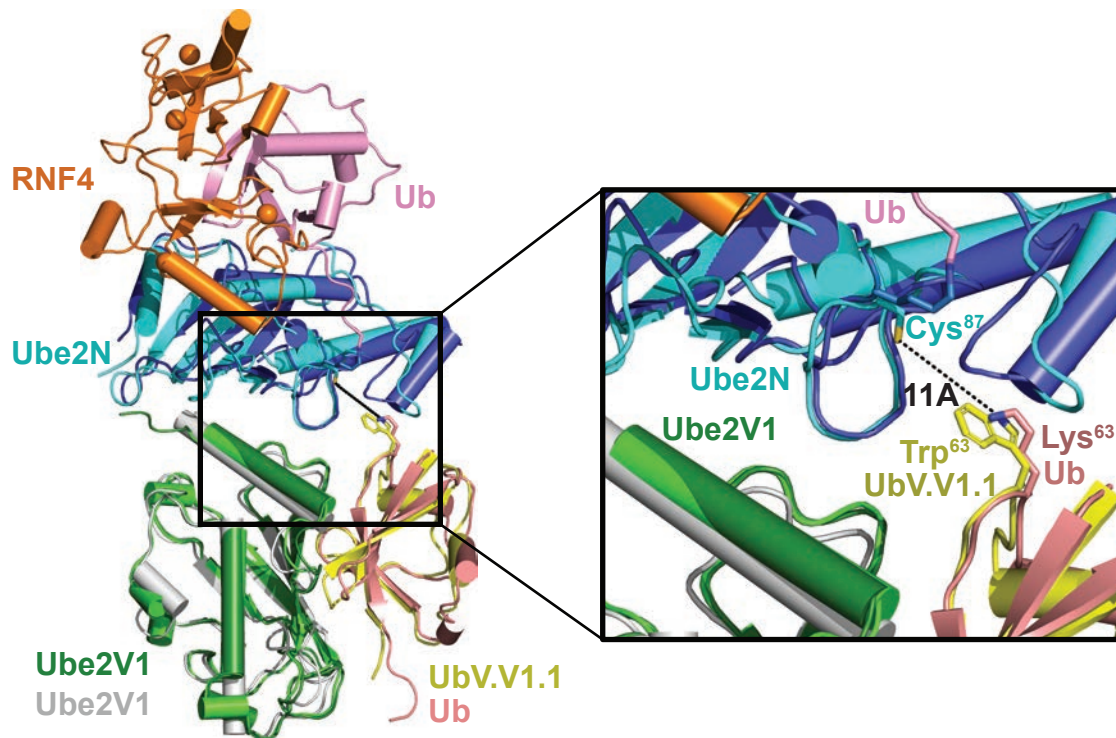

**Supplementary Figure 5. The crystal structure of the Ube2N-Ube2V1-UbV.V1.1 complex.** The complex of Ube2V1 (green), Ubv.V1.1 (yellow) and Ube2N (cyan) was superimposed on the complex of Ubc13 (blue), Ub (pink), RNF4 (orange) and Ube2V2 (green) (PDB: 5AIT) and the complex of Ube2V1 (gray) and Ub (pink) (PDB: 1ZGU). The trimeric arrangement positions Trp<sup>63</sup> of UbV.V1.1 (equivalent to Lys<sup>63</sup> of Ub positioned on Ube2V1) approximately 11 Å from the catalytic Cys<sup>87</sup> of Ube2N. A zoomed view of the interface is shown on the right.

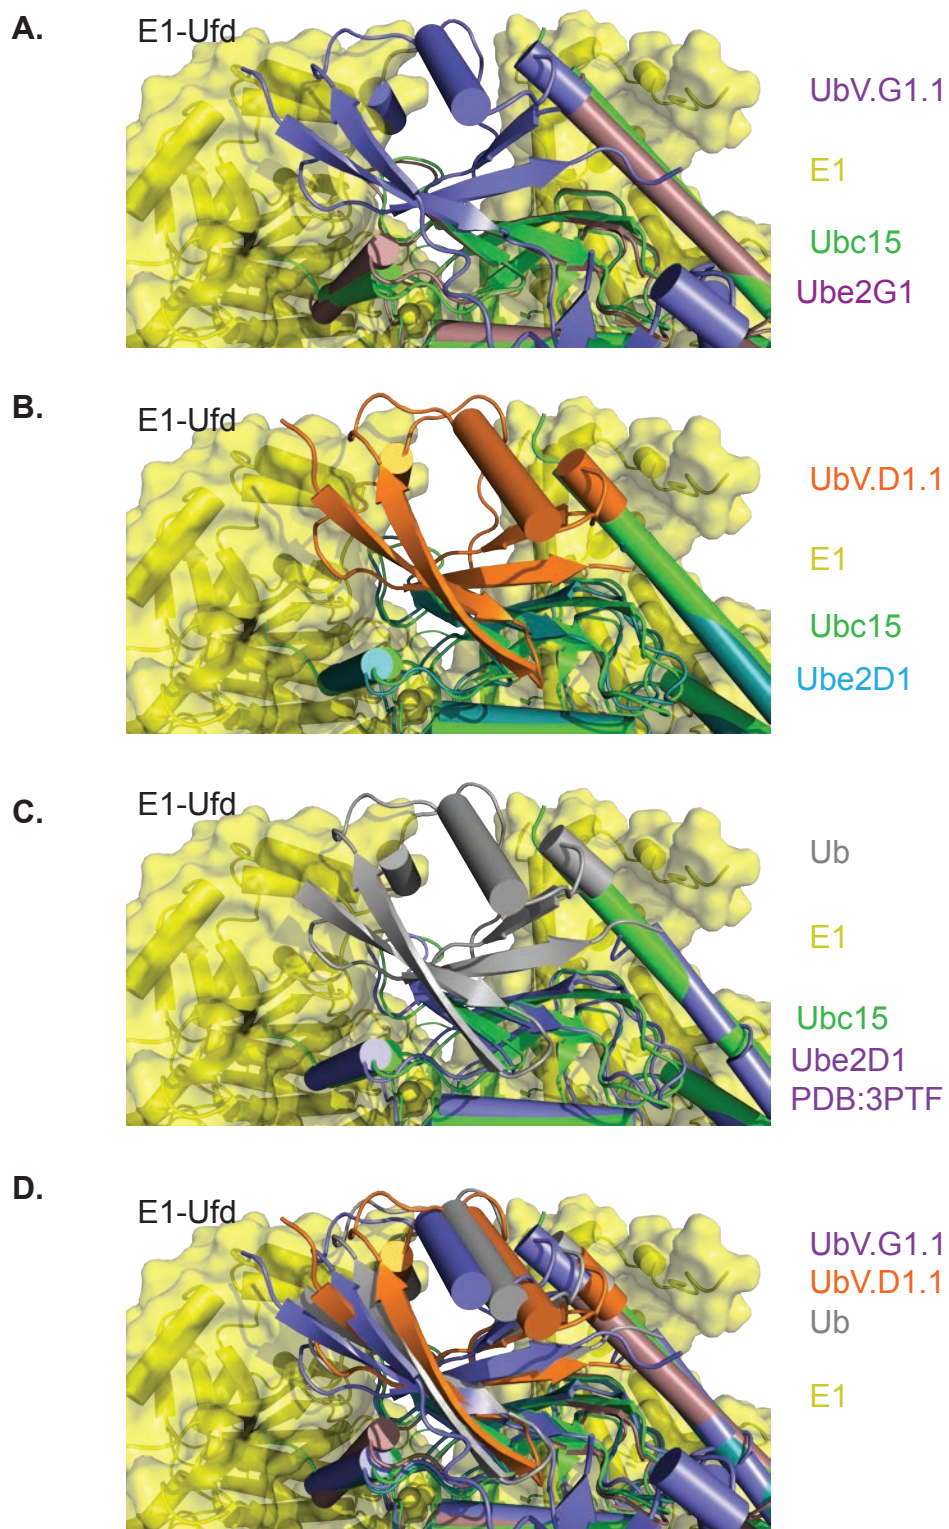

**Supplementary Figure 6. Superposition of E2-UbV backside complexes with the E1-Ubc15 complex (PDB: 5KNL).** (A) The Ub fold domain (Ufd) of E1 in yellow clashes with UbV.G1.1 in complex with the backside of Ube2G1 when superimposed on the Ubc15 E2 domain. (B) UbV.D1.1 bound to the backside of Ube2D1 exhibits minor clashes with the E1 Ufd. (C) Ub bound to the backside of Ube2D1 (PDB: 3PTF) exhibits a minor clash with the E1 Ufd. (D) Overlay of the above panels reveals that the most significant modeled clash is between UbV.G1.1 and the E1 Ufd due to a rotation of the UbV relative to Ub in the backside position.

# Supplemental Table 1

| Target | Library | UbV   | UbV sequence |   |   |   |   |   |    |    |    |    |    |    |     |    |    |    |    |    |    |    |    |    |    |    |    |    |    |    |    |   |   |
|--------|---------|-------|--------------|---|---|---|---|---|----|----|----|----|----|----|-----|----|----|----|----|----|----|----|----|----|----|----|----|----|----|----|----|---|---|
|        |         |       | wt           |   |   |   |   |   |    |    |    |    |    |    | mut |    |    |    |    |    |    |    |    |    |    |    |    |    |    |    |    |   |   |
|        |         |       | 2            | 4 | 6 | 7 | 8 | 9 | 10 | 11 | 12 | 14 | 42 | 44 | 46  | 47 | 48 | 49 | 62 | 63 | 64 | 65 | 66 | 68 | 70 | 71 | 72 | 73 | 74 | 75 | 76 |   |   |
|        |         |       | Q            | F | K | T | L | T | G  | K  | T  | T  | R  | I  | A   | G  | K  | Q  | Q  | K  | E  | S  | T  | H  | V  | L  | R  | L  | R  | G  | G  |   |   |
| Ube2D1 | 2       | D1.1  | -            | - | - | K | F | W | -  | -  | -  | -  | -  | -  | -   | -  | -  | -  | -  | K  | F  | -  | Y  | A  | Y  | G  | -  | -  | A  | -  |    |   |   |
|        | 2       | D1.2  | -            | - | - | Q | F | W | -  | -  | -  | -  | -  | -  | -   | -  | -  | -  | -  | D  | Y  | P  | -  | A  | -  | R  | P  | -  | S  | -  |    |   |   |
|        | 2       | D1.3  | -            | - | Q | A | F | S | -  | -  | -  | -  | G  | -  | -   | -  | T  | S  | -  | -  | V  | -  | A  | Y  | -  | -  | R  | -  | P  | -  |    |   |   |
|        | 2       | D1.4  | -            | - | A | - | Y | S | -  | -  | -  | -  | -  | S  | -   | -  | Y  | -  | -  | -  | R  | -  | P  | Y  | E  | V  | R  | F  | H  | Y  | S  |   |   |
|        | 2       | D1.5  | -            | - | I | - | F | - | P  | -  | -  | -  | -  | V  | -   | -  | T  | R  | -  | -  | -  | A  | G  | G  | -  | I  | R  | -  | -  | -  |    |   |   |
|        | 2       | D1.6  | -            | - | Q | - | D | - | -  | -  | -  | -  | -  | V  | -   | -  | S  | A  | -  | -  | T  | -  | P  | Y  | -  | T  | -  | P  | V  | S  |    |   |   |
|        | 2       | D1.7  | -            | - | Q | S | E | - | -  | -  | -  | -  | -  | S  | -   | -  | -  | -  | -  | -  | V  | -  | P  | Y  | L  | V  | R  | -  | -  | -  |    |   |   |
|        | 2       | D1.8  | -            | - | Q | - | F | A | -  | -  | -  | -  | -  | -  | -   | -  | -  | -  | -  | -  | V  | -  | A  | Y  | -  | -  | S  | M  | -  | R  | -  |   |   |
|        | 2       | D1.9  | -            | - | Q | - | F | - | -  | -  | -  | -  | -  | -  | T   | -  | -  | R  | -  | -  | T  | -  | A  | Y  | -  | -  | R  | -  | -  | -  | -  |   |   |
|        | 2       | D1.10 | -            | - | Q | - | F | - | -  | -  | -  | -  | K  | -  | P   | -  | G  | L  | -  | -  | V  | -  | A  | Y  | E  | -  | T  | H  | A  | -  | -  |   |   |
|        | 2       | D1.11 | -            | - | Q | - | F | - | -  | -  | -  | -  | G  | -  | -   | -  | -  | -  | -  | -  | -  | -  | A  | Y  | E  | -  | I  | I  | -  | V  | -  |   |   |
|        | 2       | D1.12 | -            | - | Q | - | F | A | -  | -  | -  | -  | -  | -  | -   | -  | -  | -  | -  | -  | V  | -  | A  | Y  | -  | -  | S  | M  | -  | R  | -  |   |   |
|        | 2       | D1.13 | -            | - | Q | - | F | - | -  | -  | -  | -  | -  | -  | -   | -  | N  | -  | -  | -  | V  | -  | P  | Y  | -  | -  | G  | V  | -  | R  | -  |   |   |
|        | 2       | D1.14 | -            | - | Q | - | F | - | -  | -  | -  | -  | -  | -  | T   | -  | -  | E  | -  | -  | -  | -  | P  | Y  | -  | -  | R  | -  | -  | -  | F  |   |   |
|        | 2       | D1.15 | -            | - | Q | - | F | - | -  | -  | -  | -  | -  | -  | -   | -  | -  | -  | -  | -  | -  | -  | P  | Y  | -  | -  | R  | H  | V  | S  | R  |   |   |
|        | 2       | D1.16 | -            | - | Q | - | F | A | -  | -  | -  | -  | -  | -  | -   | -  | -  | -  | -  | -  | L  | -  | P  | Y  | M  | F  | V  | -  | -  | -  | V  |   |   |
|        | 2       | D1.17 | -            | - | Q | - | F | S | -  | -  | -  | -  | -  | -  | T   | -  | -  | L  | -  | -  | V  | -  | A  | Y  | -  | V  | R  | -  | -  | -  | Y  |   |   |
|        | 2       | D1.18 | -            | - | Q | - | H | - | -  | -  | -  | -  | G  | -  | T   | -  | -  | -  | -  | -  | T  | -  | P  | Y  | -  | -  | K  | F  | -  | S  | V  |   |   |
|        | 2       | D1.19 | -            | - | Q | S | I | S | -  | -  | -  | -  | -  | -  | -   | -  | -  | L  | -  | -  | V  | -  | A  | Y  | E  | -  | T  | V  | -  | V  | -  |   |   |
|        | 2       | D1.20 | -            | - | Q | I | Q | - | -  | -  | -  | -  | -  | -  | -   | -  | -  | M  | P  | -  | -  | T  | -  | P  | Y  | -  | F  | R  | V  | -  | -  |   |   |
|        | 2       | D1.21 | -            | - | Q | - | W | S | -  | -  | -  | -  | K  | -  | S   | -  | T  | -  | -  | -  | Q  | -  | P  | Y  | -  | -  | R  | V  | -  | -  | -  |   |   |
|        | 2       | D1.22 | -            | - | Q | S | W | - | -  | -  | -  | -  | -  | -  | -   | -  | -  | -  | -  | -  | -  | -  | P  | Y  | -  | -  | S  | -  | -  | -  | R  |   |   |
| Ube2V1 | 1       | V1.1  | -            | - | - | - | - | - | -  | -  | -  | -  | -  | -  | -   | -  | -  | -  | H  | W  | -  | -  | L  | W  | W  | -  | -  | L  | I  | A  |    |   |   |
|        | 2       | V1.2  | -            | - | - | - | - | - | -  | -  | -  | -  | -  | -  | -   | -  | -  | -  | -  | -  | F  | -  | L  | W  | -  | -  | -  | -  | -  | -  |    |   |   |
|        | 1       | V1.3  | -            | - | - | - | - | - | -  | -  | -  | -  | -  | -  | -   | -  | -  | -  | -  | K  | -  | M  | -  | L  | W  | V  | -  | F  | H  | -  | R  |   |   |
|        | 1       | V1.4  | R            | - | - | - | - | R | E  | S  | F  | -  | -  | -  | -   | R  | L  | -  | -  | E  | -  | -  | -  | L  | W  | T  | I  | -  | -  | -  | I  |   |   |
|        | 1       | V1.5  | -            | - | - | - | - | - | -  | -  | -  | -  | -  | -  | -   | -  | -  | -  | -  | K  | -  | V  | -  | G  | -  | W  | F  | -  | F  | G  | -  | L |   |
|        | 1       | V1.6  | -            | - | L | - | T | R | V  | -  | S  | A  | -  | -  | -   | -  | -  | -  | -  | K  | Y  | -  | -  | L  | P  | -  | S  | F  | L  | -  | R  |   |   |
|        | 1       | V1.7  | -            | - | - | - | - | - | -  | -  | -  | -  | -  | -  | -   | -  | -  | -  | -  | P  | -  | A  | -  | S  | L  | W  | -  | I  | -  | -  | R  | W |   |
|        | 1       | V1.8  | -            | - | - | - | - | - | -  | -  | -  | -  | -  | -  | -   | -  | -  | -  | -  | Q  | -  | -  | -  | L  | W  | F  | -  | Q  | -  | -  | Y  |   |   |
|        | 1       | V1.9  | -            | - | L | - | P | R | V  | -  | S  | A  | -  | -  | -   | -  | -  | -  | -  | K  | Y  | -  | -  | L  | P  | -  | S  | F  | L  | -  | R  |   |   |
|        | 1       | V1.10 | -            | - | - | - | - | - | -  | -  | -  | -  | -  | -  | -   | -  | -  | -  | -  | R  | V  | -  | F  | L  | W  | -  | K  | R  | G  | L  | D  |   |   |
|        | 1       | V1.11 | -            | - | - | - | - | - | -  | -  | -  | -  | -  | -  | -   | -  | -  | -  | -  | H  | -  | N  | -  | N  | -  | -  | -  | F  | -  | W  | V  | K |   |
|        | 1       | V1.12 | E            | - | I | - | - | M | S  | G  | S  | -  | -  | -  | -   | -  | -  | -  | -  | R  | M  | -  | -  | -  | -  | -  | -  | -  | -  | -  | -  |   |   |
|        | 1       | V1.13 | -            | - | - | - | - | - | -  | -  | -  | -  | -  | -  | -   | -  | -  | -  | -  | -  | -  | -  | -  | L  | W  | F  | T  | F  | -  | -  | I  |   |   |
|        | 1       | V1.14 | -            | - | - | - | - | - | -  | -  | -  | -  | -  | -  | -   | -  | -  | -  | -  | -  | Y  | -  | G  | -  | W  | -  | K  | F  | -  | -  | S  |   |   |
|        | 1       | V1.15 | -            | - | - | - | - | - | -  | -  | -  | -  | -  | -  | -   | -  | -  | -  | -  | -  | N  | P  | -  | -  | L  | W  | -  | G  | H  | -  | S  |   |   |
|        | 1       | V1.16 | -            | - | - | - | - | - | -  | -  | -  | -  | -  | -  | -   | -  | -  | -  | -  | -  | -  | -  | -  | R  | L  | W  | -  | -  | I  | A  | -  | Q |   |
|        | 1       | V1.17 | -            | S | - | - | - | R | -  | -  | -  | -  | T  | -  | -   | -  | R  | -  | -  | R  | N  | H  | -  | -  | L  | W  | -  | I  | -  | -  | I  |   |   |
|        | 1       | V1.18 | -            | - | - | - | - | - | -  | -  | -  | -  | -  | -  | -   | -  | -  | -  | -  | -  | E  | K  | -  | G  | -  | W  | -  | -  | -  | -  | -  |   |   |
|        | 1       | V1.19 | -            | - | - | - | - | - | -  | -  | -  | -  | -  | -  | -   | -  | -  | -  | -  | -  | F  | R  | -  | A  | -  | W  | A  | -  | -  | -  | -  |   |   |
|        | 1       | V1.20 | -            | - | - | - | - | - | -  | -  | -  | -  | -  | -  | -   | -  | -  | -  | -  | -  | R  | V  | H  | -  | A  | -  | W  | A  | -  | -  | -  |   |   |
|        | 1       | V1.21 | -            | - | - | - | - | - | -  | -  | -  | -  | -  | -  | -   | -  | -  | -  | -  | -  | F  | R  | -  | A  | -  | W  | A  | -  | -  | -  | -  |   |   |
|        | 1       | V1.22 | H            | I | I | - | - | P | A  | -  | -  | -  | -  | -  | -   | -  | -  | -  | -  | K  | N  | -  | -  | A  | S  | W  | K  | K  | -  | -  | D  | K |   |
|        | 1       | V1.23 | -            | - | Q | - | - | K | V  | -  | -  | I  | -  | -  | -   | -  | L  | -  | -  | -  | P  | Q  | D  | -  | -  | W  | -  | -  | -  | -  | A  | I |   |
|        | 2       | V1.24 | -            | - | - | - | - | - | -  | -  | -  | -  | -  | -  | -   | -  | -  | -  | -  | -  | -  | -  | F  | -  | L  | W  | -  | -  | -  | N  | W  | - |   |
|        | 2       | V1.25 | -            | - | - | S | H | - | -  | -  | -  | -  | -  | -  | -   | -  | -  | -  | -  | -  | -  | D  | -  | F  | G  | V  | -  | F  | -  | -  | -  |   |   |
|        | 2       | V1.26 | -            | - | - | - | - | - | -  | -  | -  | -  | -  | -  | -   | -  | -  | -  | -  | -  | -  | -  | F  | A  | L  | W  | -  | -  | -  | -  | -  |   |   |
|        | 2       | V1.27 | -            | - | - | - | - | - | -  | -  | -  | -  | -  | -  | -   | -  | -  | -  | -  | -  | -  | -  | F  | -  | L  | W  | D  | -  | -  | -  | -  |   |   |
|        | 2       | V1.28 | -            | - | - | - | - | - | -  | -  | -  | -  | -  | -  | -   | -  | -  | -  | -  | -  | -  | -  | F  | A  | L  | W  | F  | -  | -  | G  | -  | R |   |
|        | 2       | V1.29 | -            | - | - | - | - | - | -  | -  | -  | -  | -  | -  | -   | -  | -  | -  | -  | -  | -  | -  | F  | G  | -  | W  | P  | S  | -  | -  | -  |   |   |
|        | 2       | V1.30 | -            | - | - | - | - | - | -  | -  | -  | -  | S  | -  | -   | -  | R  | K  | -  | -  | -  | -  | F  | G  | L  | W  | S  | -  | V  | S  | A  | - |   |
|        | 2       | V1.31 | -            | - | - | - | - | - | -  | -  | -  | -  | -  | -  | -   | -  | -  | -  | -  | -  | -  | -  | F  | A  | L  | W  | V  | -  | V  | G  | A  | S |   |
|        | 2       | V1.32 | -            | - | - | - | - | - | -  | -  | -  | -  | -  | -  | -   | -  | -  | -  | -  | -  | -  | -  | F  | A  | F  | W  | V  | -  | I  | I  | S  | - |   |
|        | 2       | V1.33 | -            | - | - | - | - | - | -  | -  | -  | -  | -  | -  | -   | -  | -  | -  | -  | -  | -  | -  | F  | -  | L  | W  | -  | -  | -  | N  | W  | - |   |
|        | 2       | V1.34 | -            | - | - | - | - | - | -  | -  | -  | -  | -  | -  | -   | -  | -  | -  | -  | -  | -  | -  | Y  | V  | L  | W  | T  | -  | -  | -  | V  | - |   |
|        | 2       | V1.35 | -            | - | - | - | - | - | -  | -  | -  | -  | -  | -  | -   | -  | -  | -  | -  | -  | -  | -  | Y  | M  | L  | W  | S  | -  | -  | -  | -  | - |   |
|        | 2       | V1.36 | -            | - | - | - | - | - | -  | -  | -  | -  | T  | -  | -   | -  | -  | -  | -  | -  | -  | -  | Y  | A  | I  | -  | G  | T  | R  | -  | D  | - |   |
|        | 2       | V1.37 | -            | - | - | - | - | - | -  | -  | -  | -  | -  | -  | -   | -  | -  | -  | -  | -  | -  | -  | A  | -  | G  | N  | W  | -  | -  | -  | -  | - |   |
|        | 2       | V1.38 | -            | - | - | - | - | - | -  | -  | -  | -  | -  | -  | -   | -  | -  | -  | -  | -  | -  | -  | A  | F  | A  | F  | -  | R  | -  | -  | -  | H |   |
|        | 2       | V1.39 | -            | - | - | - | - | - | -  | -  | -  | -  | -  | -  | -   | -  | -  | -  | -  | -  | -  | -  | A  | W  | -  | L  | W  | P  | -  | -  | L  | F | - |
|        | 2       | V1.40 | -            | - | - | - | - | - | -  | -  | -  | -  | -  | -  | -   | -  | -  | H  | -  | -  | -  | -  | D  | -  | A  | L  | W  | V  | -  | -  | -  | - |   |

Supplementary Table 1 continued

| Target | Library | Ubv   | Ub variant sequence |   |   |   |   |   |    |    |    |    |    |    |    |    |    |    |    |    |    |    |    |    |    |    |    |    |    |    |    |   |   |
|--------|---------|-------|---------------------|---|---|---|---|---|----|----|----|----|----|----|----|----|----|----|----|----|----|----|----|----|----|----|----|----|----|----|----|---|---|
|        |         |       | 2                   | 4 | 6 | 7 | 8 | 9 | 10 | 11 | 12 | 14 | 42 | 44 | 46 | 47 | 48 | 49 | 62 | 63 | 64 | 65 | 66 | 68 | 70 | 71 | 72 | 73 | 74 | 75 | 76 |   |   |
|        |         | wt    | Q                   | F | K | T | L | T | G  | K  | T  | T  | R  | I  | A  | G  | K  | Q  | Q  | K  | E  | S  | T  | H  | V  | L  | R  | L  | R  | G  | G  |   |   |
| Ube2V1 | 2       | V1.41 | -                   | - | - | - | M | - | -  | -  | -  | -  | -  | -  | -  | -  | -  | -  | -  | D  | F  | G  | L  | W  | -  | -  | -  | -  | -  | -  |    |   |   |
|        | 2       | V1.42 | -                   | - | - | - | - | - | -  | -  | -  | -  | -  | -  | -  | -  | -  | -  | -  | -  | D  | F  | V  | L  | W  | M  | -  | -  | -  | -  | -  |   |   |
|        | 2       | V1.43 | -                   | - | - | - | - | - | -  | -  | -  | -  | -  | -  | -  | -  | -  | -  | -  | -  | G  | F  | -  | L  | W  | -  | -  | I  | P  | R  | D  |   |   |
|        | 2       | V1.44 | -                   | - | - | - | - | - | -  | -  | -  | -  | -  | -  | -  | -  | -  | -  | -  | -  | G  | F  | -  | L  | W  | -  | -  | -  | P  | W  | S  |   |   |
|        | 2       | V1.45 | -                   | - | - | - | - | - | -  | -  | -  | -  | -  | -  | -  | -  | -  | -  | -  | -  | Q  | F  | -  | L  | W  | V  | K  | F  | P  | S  | S  |   |   |
|        | 2       | V1.46 | -                   | - | - | - | - | - | -  | -  | -  | -  | -  | -  | -  | -  | -  | -  | -  | -  | S  | F  | A  | L  | W  | D  | -  | I  | -  | -  | -  |   |   |
|        | 2       | V1.47 | -                   | - | - | I | - | - | -  | -  | -  | -  | -  | -  | -  | -  | -  | -  | -  | -  | -  | Y  | A  | L  | W  | W  | -  | P  | -  | S  | V  |   |   |
|        | 2       | V1.48 | -                   | - | N | - | A | - | -  | -  | -  | -  | -  | I  | -  | -  | -  | -  | L  | -  | -  | H  | -  | L  | W  | W  | -  | -  | T  | -  | S  |   |   |
|        | 2       | V1.49 | -                   | - | P | - | S | S | -  | -  | -  | -  | -  | -  | -  | -  | -  | -  | -  | -  | D  | Y  | V  | L  | W  | -  | -  | -  | P  | -  | -  |   |   |
|        | 2       | V1.50 | -                   | - | S | - | - | - | -  | -  | -  | -  | -  | -  | -  | -  | -  | -  | -  | -  | -  | F  | -  | L  | W  | T  | -  | -  | -  | E  | D  |   |   |
|        | 2       | V1.51 | -                   | - | S | - | - | - | -  | -  | -  | -  | -  | -  | -  | -  | -  | -  | -  | -  | V  | A  | -  | L  | W  | F  | Q  | -  | -  | -  | -  |   |   |
|        | 2       | V1.52 | -                   | - | N | K | G | K | -  | -  | -  | -  | -  | -  | -  | -  | -  | -  | -  | -  | -  | Y  | A  | N  | G  | V  | S  | I  | -  | -  | -  |   |   |
|        | 2       | V1.53 | -                   | - | Q | I | - | Y | -  | -  | -  | -  | -  | A  | -  | -  | -  | -  | -  | -  | -  | R  | F  | G  | L  | W  | F  | T  | -  | -  | -  | - |   |
|        | 2       | V1.54 | -                   | - | Q | S | - | S | -  | -  | -  | -  | -  | -  | -  | -  | -  | -  | -  | -  | -  | D  | F  | N  | -  | W  | F  | -  | I  | F  | -  | - |   |
|        | 2       | V1.55 | -                   | - | T | - | - | P | -  | -  | -  | -  | -  | -  | -  | -  | -  | -  | -  | -  | -  | F  | R  | I  | -  | G  | -  | F  | H  | S  | -  | - |   |
| 2      | V1.56   | -     | -                   | T | L | V | M | - | -  | -  | -  | -  | G  | -  | -  | -  | -  | K  | -  | -  | R  | -  | S  | Y  | -  | -  | S  | T  | L  | -  | -  |   |   |
| Ube2G1 | 2       | G1.1  | -                   | - | - | P | I | R | V  | -  | -  | -  | -  | S  | -  | -  | L  | -  | -  | -  | Y  | -  | -  | L  | -  | -  | R  | H  | -  | -  |    |   |   |
|        | 2       | G1.2  | -                   | - | - | V | F | W | -  | -  | -  | -  | -  | -  | -  | -  | L  | -  | -  | -  | K  | F  | A  | -  | L  | -  | -  | -  | -  | -  | -  |   |   |
|        | 2       | G1.3  | -                   | - | - | N | I | R | -  | -  | -  | -  | G  | -  | G  | -  | -  | W  | -  | -  | -  | Y  | S  | -  | -  | -  | -  | -  | -  | Y  | -  |   |   |
|        | 2       | G1.4  | -                   | - | - | V | F | W | -  | -  | -  | -  | -  | -  | -  | -  | -  | L  | -  | -  | -  | Y  | A  | N  | G  | V  | S  | I  | -  | -  | -  |   |   |
|        | 2       | G1.5  | -                   | - | - | A | G | R | -  | -  | -  | -  | -  | -  | -  | -  | -  | L  | -  | -  | -  | F  | A  | -  | -  | -  | -  | -  | -  | -  | -  |   |   |
|        | 2       | G1.6  | -                   | - | - | H | - | R | A  | -  | -  | -  | T  | -  | -  | -  | -  | L  | -  | -  | -  | F  | A  | Q  | -  | -  | -  | -  | -  | R  | -  |   |   |
|        | 2       | G1.7  | -                   | - | - | A | F | Y | -  | -  | -  | -  | -  | -  | -  | -  | -  | -  | -  | -  | -  | F  | A  | -  | L  | -  | -  | -  | P  | -  | -  |   |   |
|        | 2       | G1.8  | -                   | - | - | A | F | Y | -  | -  | -  | -  | -  | -  | -  | -  | -  | -  | -  | -  | -  | L  | Y  | -  | L  | M  | -  | V  | -  | -  | V  |   |   |
|        | 2       | G1.9  | -                   | - | - | K | G | Y | -  | -  | -  | -  | G  | -  | -  | -  | -  | N  | -  | -  | -  | -  | Y  | R  | L  | -  | -  | -  | -  | -  | -  |   |   |
| Ube2G2 | 1       | G2.1  | -                   | - | R | - | - | K | W  | -  | I  | S  | -  | Y  | S  | -  | -  | -  | -  | R  | M  | G  | -  | N  | -  | -  | F  | -  | I  | L  | -  | K |   |
|        | 1       | G2.2  | -                   | - | R | - | V | N | R  | S  | -  | -  | -  | -  | S  | -  | -  | H  | -  | -  | K  | -  | Q  | -  | A  | L  | I  | -  | -  | M  | -  | N |   |
|        | 1       | G2.3  | -                   | - | - | - | - | K | W  | Q  | I  | -  | -  | -  | -  | -  | -  | -  | -  | -  | K  | -  | K  | -  | -  | L  | -  | Q  | -  | -  | G  | V | - |
|        | 1       | G2.4  | T                   | - | - | - | P | K | W  | -  | I  | N  | I  | F  | -  | -  | -  | K  | -  | -  | -  | Q  | -  | -  | L  | G  | -  | -  | -  | -  | -  | - |   |
|        | 1       | G2.5  | -                   | - | - | - | - | - | W  | -  | L  | -  | -  | -  | -  | -  | -  | -  | -  | -  | R  | -  | N  | -  | -  | Y  | -  | -  | -  | I  | -  | Q |   |
|        | 1       | G2.6  | H                   | - | - | - | I | - | W  | Y  | -  | -  | -  | F  | -  | -  | T  | P  | -  | -  | R  | -  | G  | -  | N  | -  | -  | V  | -  | -  | S  | Y |   |
|        | 1       | G2.7  | -                   | - | R | - | - | N | R  | N  | -  | -  | -  | -  | -  | -  | -  | H  | -  | -  | K  | -  | Q  | -  | Y  | L  | -  | -  | -  | M  | -  | D |   |
|        | 1       | G2.8  | -                   | - | - | - | - | - | W  | -  | I  | I  | -  | F  | -  | -  | -  | D  | -  | -  | R  | -  | -  | -  | L  | -  | -  | -  | -  | -  | -  | - |   |
|        | 1       | G2.9  | -                   | - | R | - | I | - | W  | -  | -  | -  | -  | -  | -  | -  | -  | -  | -  | -  | R  | N  | R  | -  | F  | -  | -  | -  | T  | -  | -  | I |   |
|        | 1       | G2.10 | -                   | - | - | - | - | - | W  | -  | V  | -  | -  | -  | -  | -  | -  | -  | -  | -  | -  | H  | K  | -  | -  | L  | -  | -  | -  | -  | -  | - |   |
|        | 1       | G2.11 | -                   | - | - | - | I | - | W  | -  | I  | -  | -  | F  | S  | -  | -  | -  | -  | -  | -  | -  | -  | -  | L  | -  | -  | -  | F  | -  | -  | R |   |
|        | 1       | G2.12 | R                   | - | - | - | I | K | W  | -  | S  | -  | I  | -  | -  | -  | -  | K  | -  | -  | -  | D  | -  | -  | L  | G  | -  | -  | -  | -  | A  | K |   |
|        | 1       | G2.13 | D                   | - | - | - | - | - | W  | -  | I  | P  | -  | F  | -  | -  | -  | P  | -  | -  | H  | -  | G  | -  | -  | L  | -  | -  | -  | -  | -  | - |   |
|        | 1       | G2.14 | -                   | - | T | - | - | - | W  | D  | V  | -  | M  | F  | -  | -  | -  | K  | -  | -  | -  | K  | -  | N  | -  | -  | F  | T  | P  | -  | -  | T |   |
|        | 1       | G2.15 | -                   | - | R | - | - | - | N  | R  | S  | -  | -  | -  | S  | -  | -  | -  | H  | -  | -  | H  | -  | A  | L  | I  | -  | -  | I  | -  | -  | N |   |
| 1      | G2.16   | -     | -                   | R | - | - | - | R | L  | L  | -  | -  | -  | -  | -  | -  | -  | -  | -  | -  | K  | -  | -  | Y  | L  | -  | F  | -  | -  | -  | V  |   |   |
| 1      | G2.17   | -     | -                   | R | - | - | - | R | N  | I  | N  | -  | -  | -  | -  | -  | -  | H  | -  | -  | R  | T  | K  | -  | F  | I  | L  | -  | -  | P  | -  | R |   |
| 1      | G2.18   | -     | -                   | R | - | - | - | W | -  | I  | -  | -  | N  | -  | -  | -  | -  | Y  | -  | -  | -  | K  | -  | N  | L  | -  | -  | -  | I  | L  | -  | E |   |
